# Supplementary material for: Defective autophagy and increased apoptosis contribute toward the pathogenesis of FKRP-associated muscular dystrophies
Source: PubMed Central journal article supplement — Stem Cell Reports. 2021 Oct 14;16(11):2752–67. doi: 10.1016/j.stemcr.2021.09.009 (PMC8581053; doi:10.1016/j.stemcr.2021.09.009), 2021-10-14
Supplement: mmc1.pdf [file mmc1.pdf]

**Stem Cell Reports, Volume 16**

**Supplemental Information**

**Defective autophagy and increased apoptosis contribute toward the pathogenesis of FKRP-associated muscular dystrophies**

**Carolina Ortiz-Cordero, Claudia Bincoletto, Neha R. Dhoke, Sridhar Selvaraj, Alessandro Magli, Haowen Zhou, Do-Hyung Kim, Anne G. Bang, and Rita C.R. Perlingeiro**

**Figure S1**

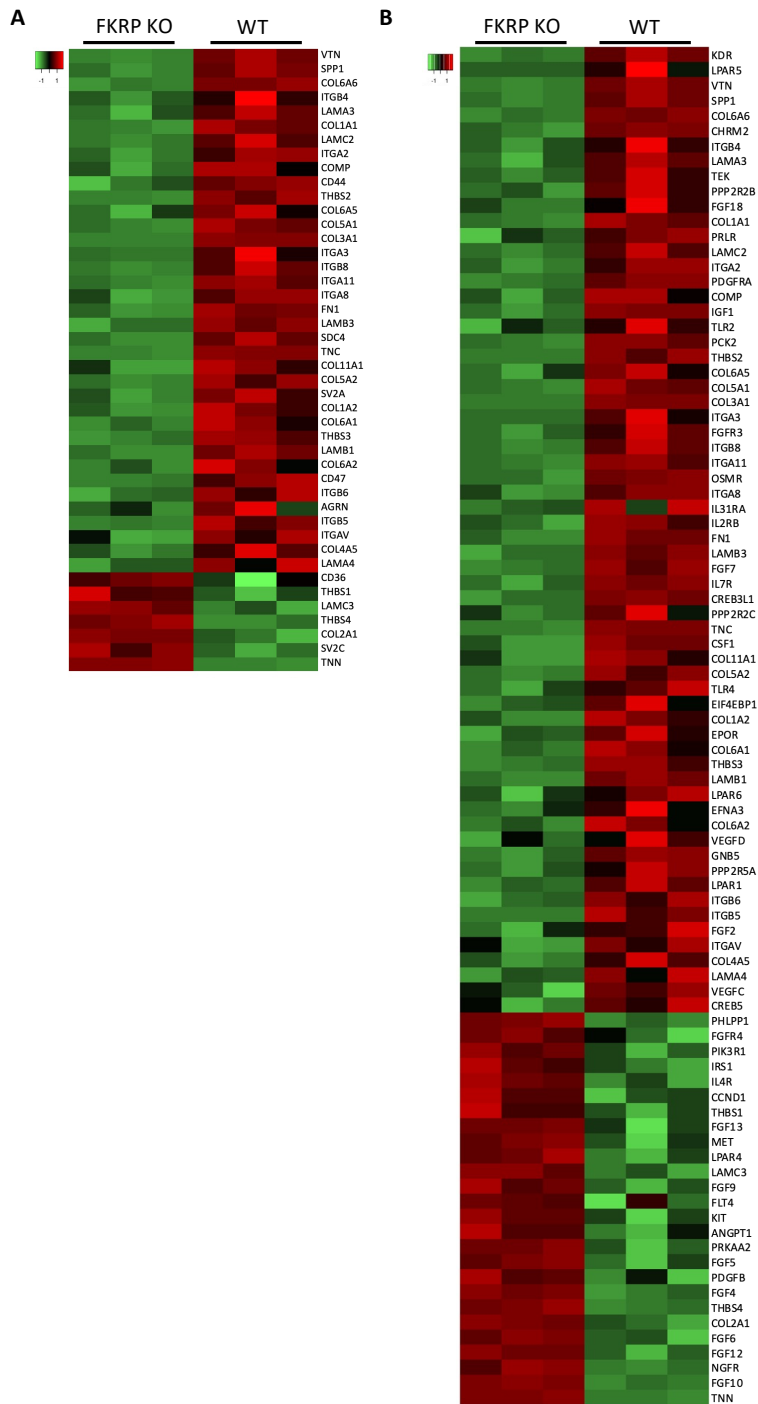

**Figure S2**

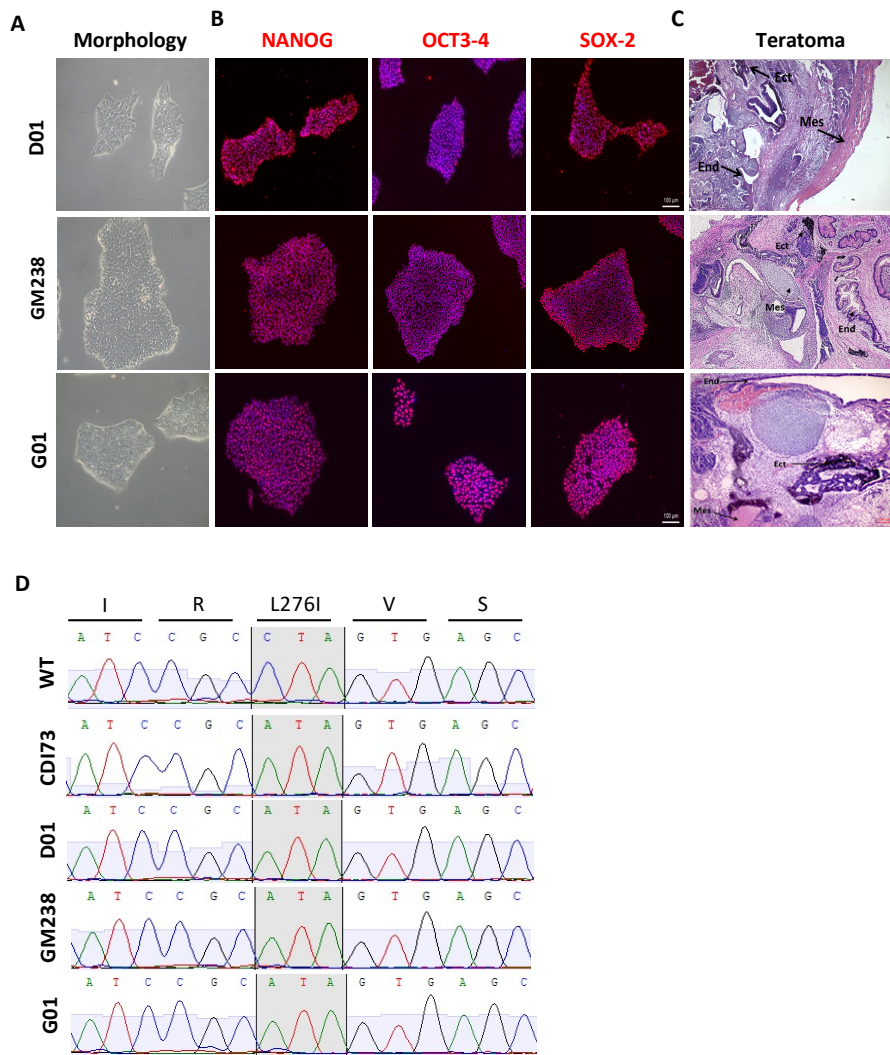

**Figure S3**

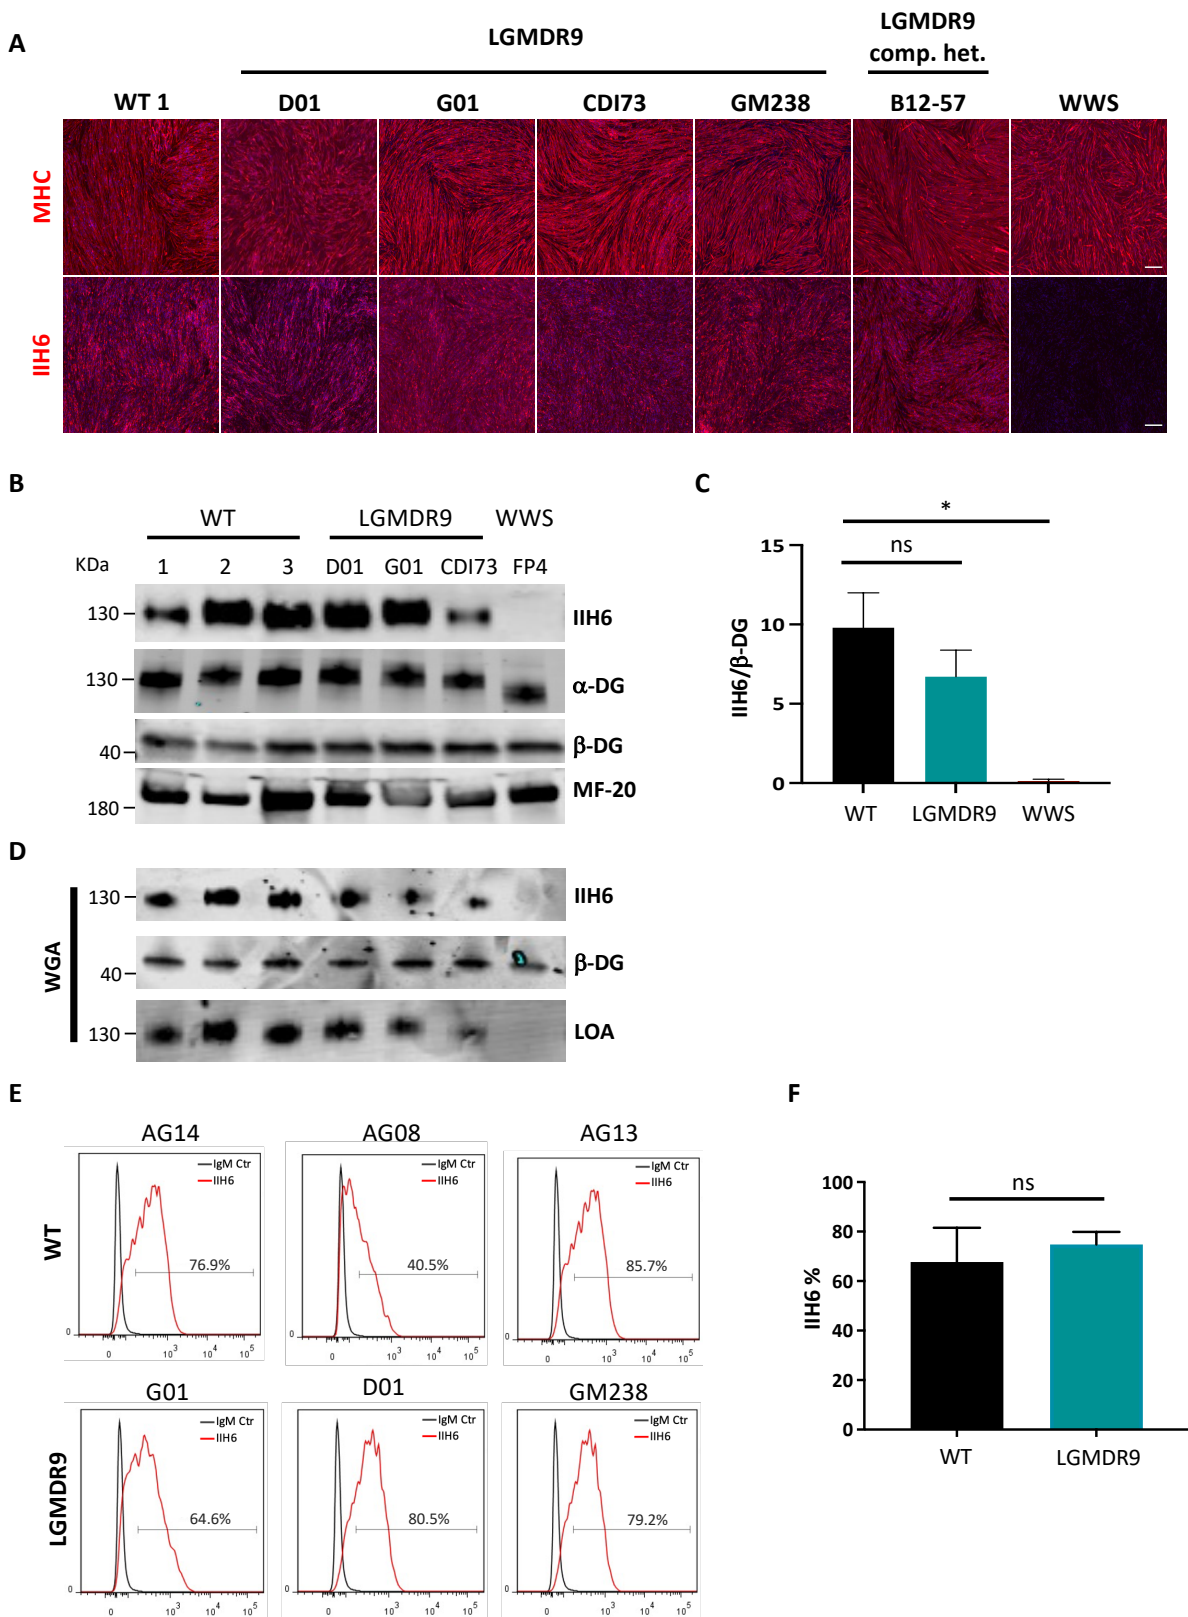



**Figure S4**

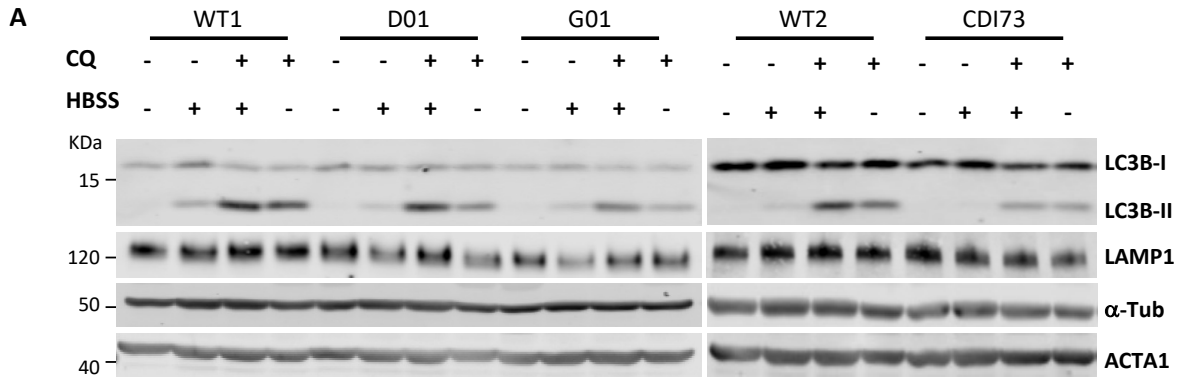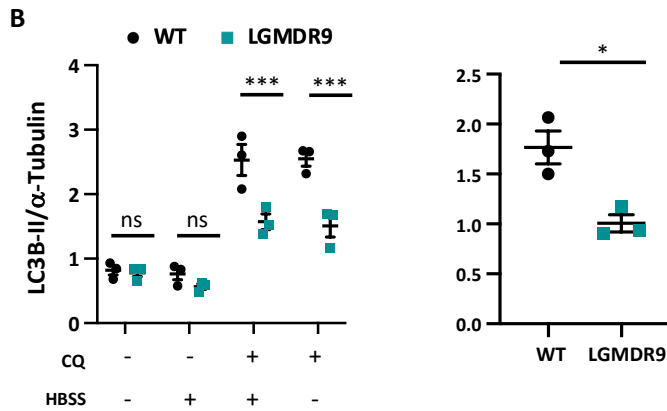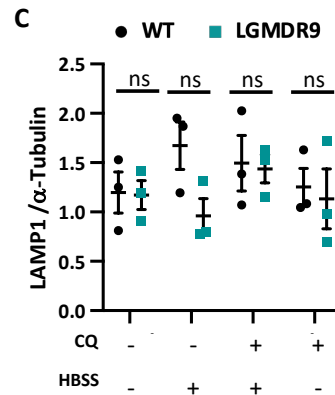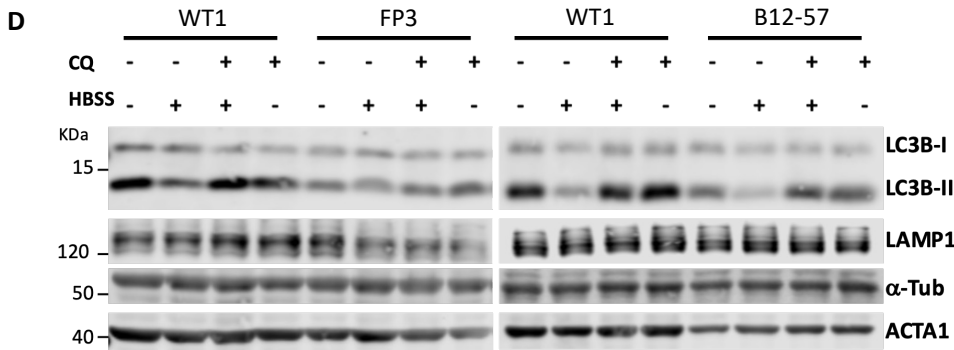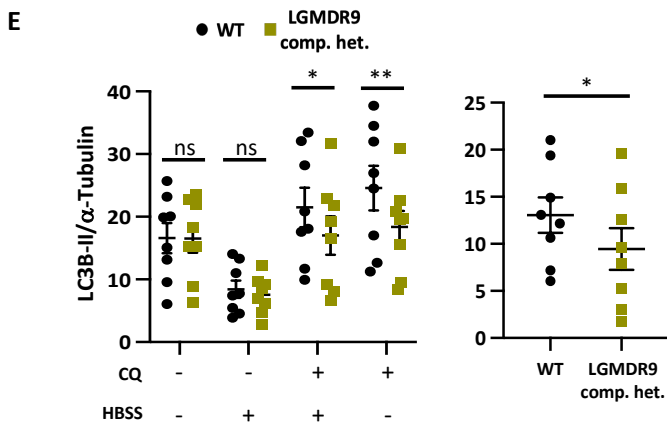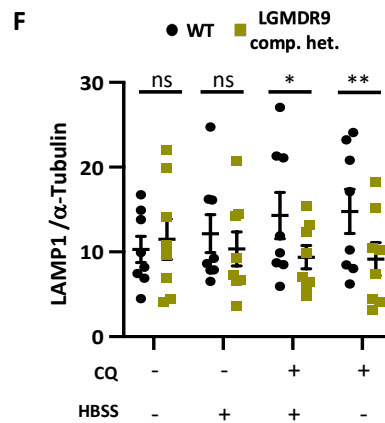

**Figure S5**

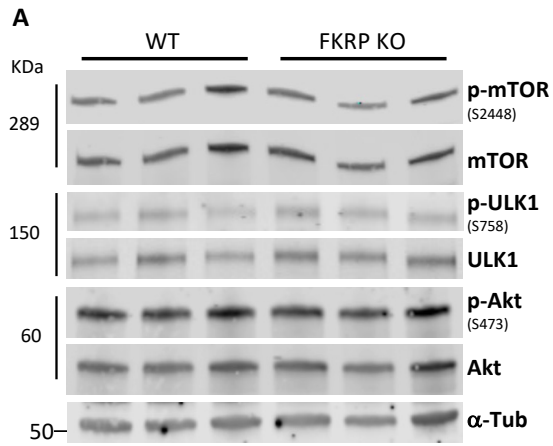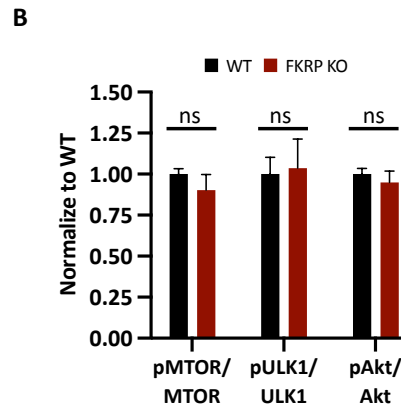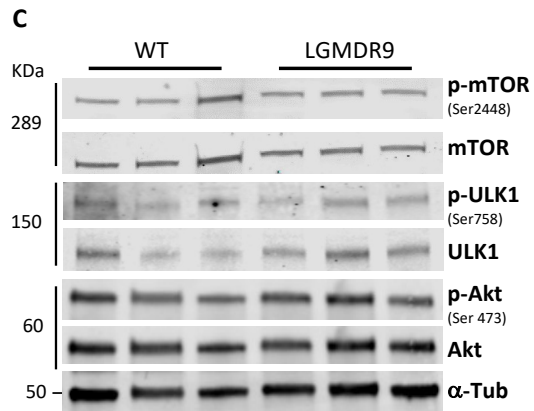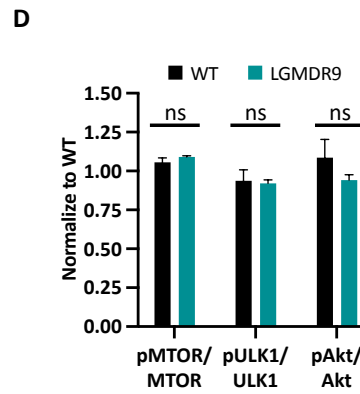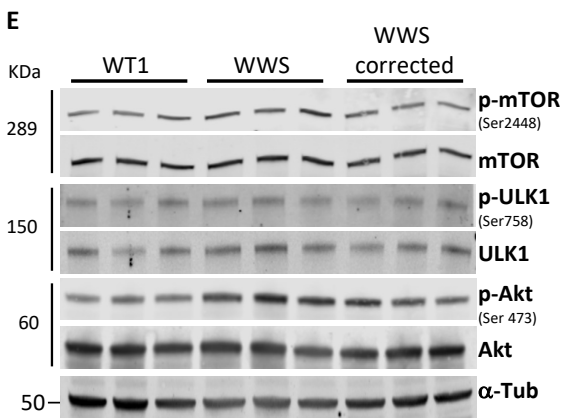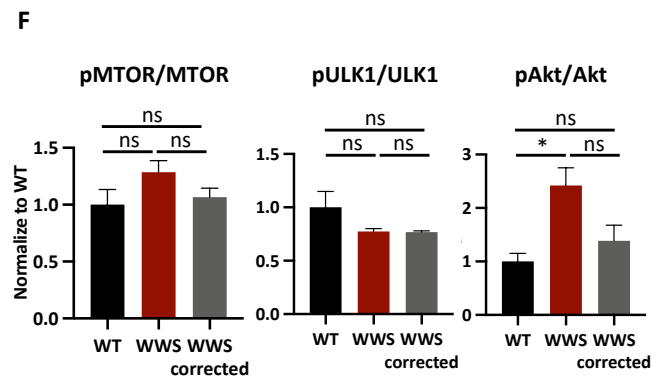

**Figure S6**

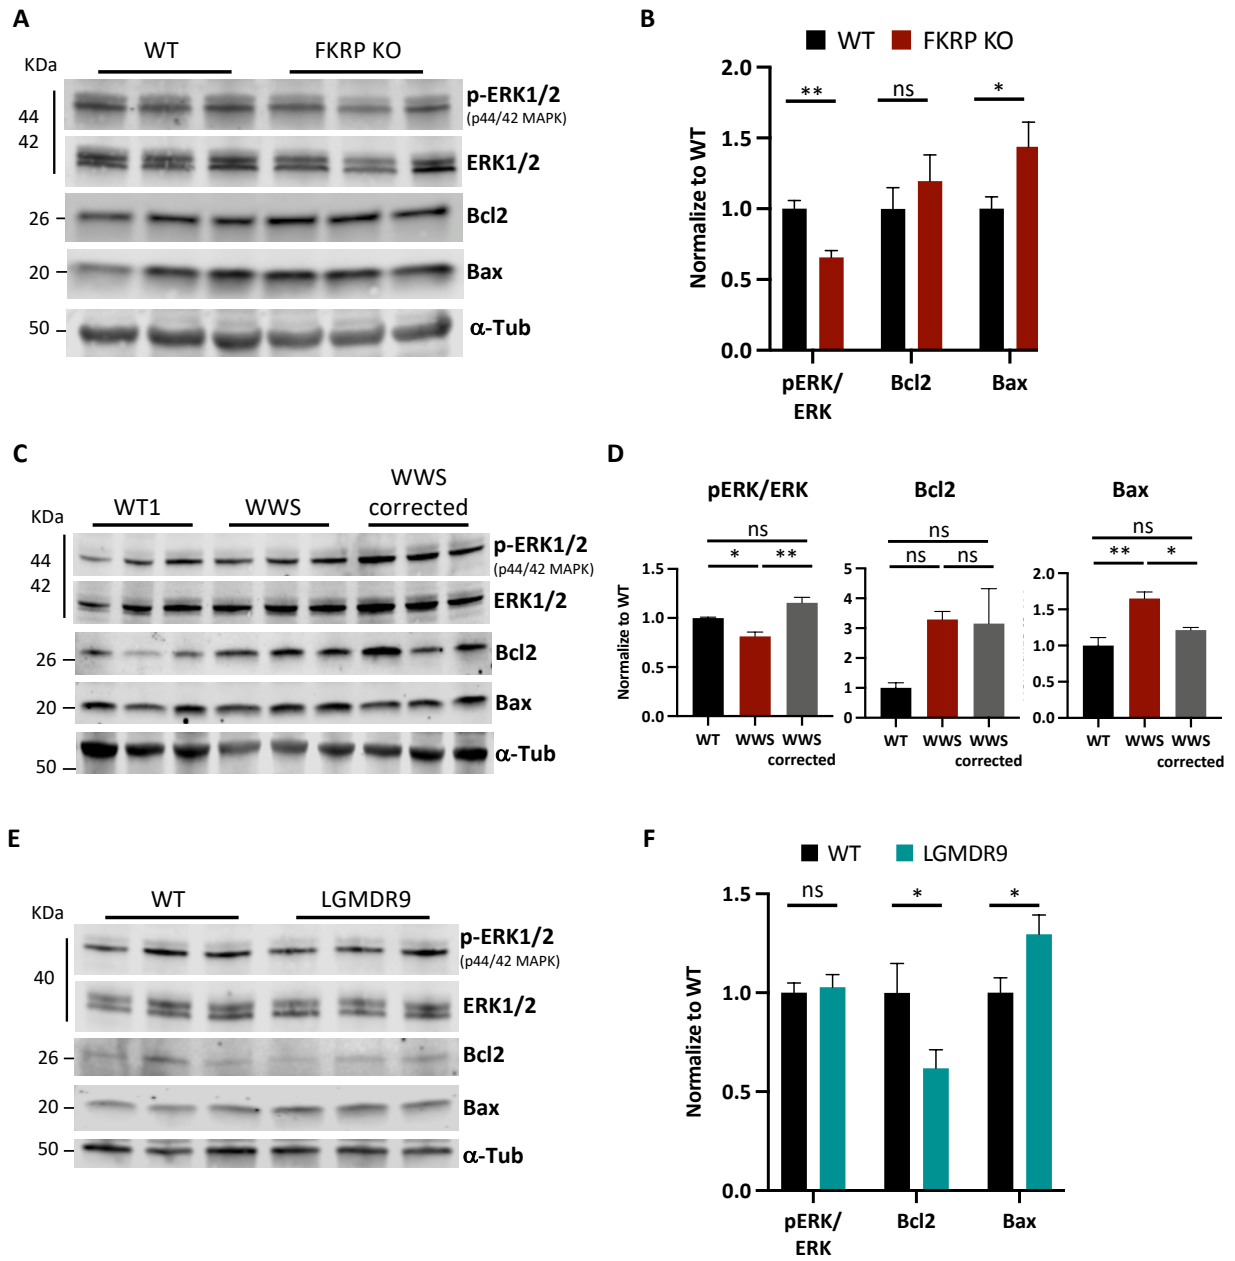

**Figure S1.** Differentially expressed genes in FKRP KO myotubes and isogenic WT.

(A-C) Heatmap of differentially expressed genes associated with (A) calcium signaling pathway, (B) extracellular matrix receptor (ECM) interaction, and (C) PI3K-Akt signaling pathway in isogenic WT and FKRP KO myotubes.

**Figure S2.** Characterization of LGMDR9 FKRP patient specific-iPS cells.

(A-B) Representative images show typical (A) pluripotent colony morphology, (B) immunostaining for OCT3/4, SOX2, and NANOG (red) for D01, GM283, and G01 iPS cells. DAPI stains nuclei in blue.

(C) Representative image shows hematoxylin-eosin staining of a teratoma denoting the presence of tissues derived from all three germ layers for D01, GM283, and G01 iPS cells.

(D) Sequencing chromatograms show CDI73, D01, GM283, and G01 iPS cell lines are homozygous for FKRP mutation c.826C>A. Unaffected iPS cells were used as a control for given sequences.

**Figure S3.** Characterization of  $\alpha$ -dystroglycan glycosylation in FRKP mutant cells.

(A) Representative immunostaining for MHC and IIH6 (red) for LGMDR9 D01, G01, CDI73, and GM238, LGMDR9 compound heterozygous (comp. het.) B12-57, WWS, and WT iPS cell-derived myotubes DAPI stained nuclei (in blue). Scale bar, 200 $\mu$ m.

(B) Western blot for IIH6 in WT1, WT2 WT3, LGMDR9 D01, G01 CDI73, and WWS myotubes.  $\beta$ -DG was used as the loading control.

(C) Graph bars show respective quantification of IIH6 (B) normalized to  $\beta$ -DG. \* $p$ <0.05 by one-way ANOVA followed by Sidak's multiple comparison test. Error bars represent standard errors of 3 independent experiments.

(D) Representative WGA pull-down laminin overlay assay (LOA) for samples in (B).

(E) Histogram of flow cytometry analysis for IIH6 in LGMDR9 and WT control fibroblasts.

(F) Bar graph shows quantification of (E). Significance was evaluated by unpaired Student's t-test. Error bars represent standard errors of 3 independent cell lines.

**Figure S4.** Autophagy is decreased in LGMDR9 myotubes.

(A) Western blot for LC3B-II and LAMP1 in WT1, WT2, and LGMDR9 D01, G01, CDI73 myotubes. Cells were assessed under basal or Hanks' Balanced Salt Solution (HBSS), with or without 100  $\mu$ M chloroquine (CQ).

(B-C) Respective quantification for LC3B-II (B) and LAMP1 (C) of western blots shown in (A) normalized to  $\alpha$ -tubulin. Right panel in (B) shows flux calculated as the difference in LC3B-II levels of HBSS-treated myotubes with and without CQ. \* $p < 0.05$ , \*\*\* $p < 0.001$ , by RM two-way ANOVA followed by Sidak's multiple comparison test and paired Student's t-test in (B) right panel. Each symbol represents the average of 4-5 repetitions for each cell line. Error bars are mean  $\pm$  SEM.

(D) Western blot for LC3B-II and LAMP1 in WT1, and LGMDR9 compound heterozygous (comp. het.) FP3 and B12-57 myotubes. Cells were assessed under basal or Hanks' Balanced Salt Solution (HBSS), with or without 100  $\mu$ M chloroquine (CQ).

(E-F) Respective quantification for LC3B-II (E) and LAMP1 (F) of western blots shown in (D) normalized to  $\alpha$ -tubulin. Right panel in (E) shows flux calculated as the difference in LC3B-II levels of HBSS-treated myotubes with and without CQ. \* $p < 0.05$ , \*\* $p < 0.01$ , by RM two-way ANOVA followed by Sidak's multiple comparison test and paired Student's t-test in (E) right panel. Error bars are mean  $\pm$  SEM for 8 independent experiments, 4 independent experiments for each LGMDR9 comp. het. cell line. Error bars are mean  $\pm$  SEM.

**Figure S5.** Akt and mTOR activity in FKRP KO and patient-derived myotubes

(A) Western blot for mTOR, ULK1, and Akt activity in FKRP KO and parental WT myotubes.  $\alpha$ -tubulin was used as loading controls.

(B) Bar graphs show respective quantification of (A) normalized to parental WT. ns  $p > 0.05$  by unpaired Student's t-test. Error bars represent standard errors of 3 independent experiments.

(C) Western blot for mTOR, ULK1, and Akt activity in D01, G01, CDI73 LGMDR9 myotubes and WT1, WT3, and WT3 controls.  $\alpha$ -tubulin was used as loading controls.

(D) Bar graphs show respective quantification of (C) normalized to isogenic WT. ns  $p > 0.05$  by unpaired Student's t-test. Error bars represent standard errors of 3 independent experiments.

(E) Western blot for mTOR, ULK1, and Akt activity in WT1, WWS, and WWS corrected iPS cell-derived myotubes.  $\alpha$ -tubulin was used as loading controls.

(F) Bar graphs show respective quantification of (E) normalized to WT. \* $p < 0.05$  by one-way ANOVA followed by Sidak's multiple comparison test. Error bars represent standard errors of 3 independent experiments.

**Figure S6.** ERK1/2 activity and markers of apoptosis in FKRP KO and patient-derived myotubes

(A) Western blot for phospho-ERK1/2, ERK1/2, Bax, and Bcl2 in FKRP KO myotubes and WT control.  $\alpha$ -tubulin was used as loading controls.

(B) Quantification of (A) normalized to WT counterpart. \* $p < 0.05$ , \*\* $p < 0.01$  by unpaired Student's t-test. Error bars represent standard errors of 3 independent experiments.

(C) Western blot for ERK1/2 activity, Bcl-2, and Bax in WT1, WWS, and WWS corrected myotubes.  $\alpha$ -tubulin was used as loading controls.

(D) Quantification of (C) normalized to WT. \* $p < 0.05$ , \*\* $p < 0.01$  by one-way ANOVA followed by Sidak's multiple comparison test. Error bars represent standard errors of 3 independent experiments.

(E) Western blot for ERK1/2 activity, Bcl-2 and Bax in WT1, WT2, and WT3 controls and D01, G01, CDI73 LGMDR9 myotubes.  $\alpha$ -tubulin was used as loading controls.

(F) Quantification of (E) normalized to WT. \* $p < 0.05$ . by unpaired Student's t-test. Error bars represent standard errors of 3 independent experiments for 3 LGMDR9 and 3 WT lines.

**Table S1.** Pluripotent stem cell lines and fibroblast used in this study.

| Cell line    | Cell type          | Clinical Phenotype | Age at biopsy | Nucleotide variant     | Amino Acid                 | Reference                     |
|--------------|--------------------|--------------------|---------------|------------------------|----------------------------|-------------------------------|
| WT (H9)      | ESC                | none               | -             | -                      | -                          | WiCell                        |
| WT1 (PLZ)    | iPSC               | none               | Adult         | -                      | -                          | (Darabi et al., 2012)         |
| WT3 (TC1133) | iPSC               | none               | Adult         | -                      | -                          | (Selvaraj et al., 2019)       |
| WT3 (B05)    | iPSC               | none               | Adult         | -                      | -                          | (Darabi <i>et al.</i> , 2012) |
| AG08         | Fibroblast         | none               | 31            | -                      | -                          | Coriell Institute             |
| AG13         | Fibroblast         | none               | 30            | -                      | -                          | Coriell Institute             |
| AG14         | Fibroblast         | none               | 35            | -                      | -                          | Coriell Institute             |
| CDI73        | iPSC               | LGMDR9             | Adult         | c.826C>A<br>c.826C>A   | p.Leu276Ile<br>p.Leu276Ile | Cellular Dynamics             |
| GM238        | Fibroblast<br>iPSC | LGMDR9             | 38            | c.826C>A<br>c.826C>A   | p.Leu276Ile<br>p.Leu276Ile | This study                    |
| D01          | Fibroblast<br>iPSC | LGMDR9             | 27            | c.826C>A<br>c.826C>A   | p.Leu276Ile<br>p.Leu276Ile | This study                    |
| G01          | Fibroblast<br>iPSC | LGMDR9             | 8             | c.826C>A<br>c.826C>A   | p.Leu276Ile<br>p.Leu276Ile | This study                    |
| B12-57       | iPSC               | LGMDR9             | 3             | c.826C>A<br>c.534G>T   | p.Leu276Ile<br>p.Trp178Cys | (Nickolls et al., 2020)       |
| FP3          | iPSC               | LGMDR9/<br>CMD     | 1.25          | c.217C>T<br>c.826C>A   | p.Glu73 OCH<br>p.Leu276Ile | (Dhoke et al., 2021)          |
| FP4          | iPSC               | WWS                | < 1yr         | c.558dupC<br>c.1418T>G | p.Ala187Fs<br>p.Phe473Cys  | (Ortiz-Cordero et al., 2021)  |



**Table S2.** Muscle biopsies used in this study

| Identifier | Sex | Clinical Phenotype | Age at biopsy | Nucleotide variant     | Amino Acid                 |
|------------|-----|--------------------|---------------|------------------------|----------------------------|
| CTRL5a     | F   | none               | 9             | -                      | -                          |
| CTRL6b     | M   | none               | 3             | -                      | -                          |
| CTRL61     | F   | none               | 34            | -                      | -                          |
| 04-07071   | F   | CMD                | 1             | c.1387A>G<br>c.1387A>G | p.Asn463Asp<br>p.Asn463Asp |
| 10-11175   | M   | CMD                | 2             | c.1387A>G<br>c.1387A>G | p.Asn463Asp<br>p.Asn463Asp |
| 17-39292   | M   | CMD                | 2             | c.1387A>G<br>c.1387A>G | p.Asn463Asp<br>p.Asn463Asp |
| 07-17608   | F   | LGMDR9             | 34            | c.826C>A<br>c.826C>A   | p.Leu276Ile<br>p.Leu276Ile |
| 12-18979   | M   | LGMDR9             | 7             | c.826C>A<br>c.826C>A   | p.Leu276Ile<br>p.Leu276Ile |
| 12-22942   | M   | LGMDR9             | 28            | c.826C>A<br>c.826C>A   | p.Leu276Ile<br>p.Leu276Ile |

**Table S3.** Antibodies used throughout this study

| Target                                          | Company/Source                                             | Concentration             | Catalog No.        |
|-------------------------------------------------|------------------------------------------------------------|---------------------------|--------------------|
| $\alpha$ -Dystroglycan                          | Millipore Sigma<br>Developmental Studies<br>Hybridoma Bank | 1:1000 (WB)<br>1:50 (IF)  | 05-593<br>IIH6 C4  |
| $\alpha$ -Tubulin (TU-02)                       | Santa Cruz Biotechnology                                   | 1:1000                    | sc-8035            |
| $\beta$ -Dystroglycan (concentrated)            | Developmental Studies<br>Hybridoma Bank                    | 1:1500                    | MANDAG2 (7D11)     |
| Actin ( $\alpha$ -Sarcomeric)                   | Sigma-Aldrich                                              | 1:1000                    | A2172              |
| Akt                                             | Cell Signaling Technologies                                | 1:1000                    | 9272               |
| Bax                                             | Proteintech                                                | 1:2000                    | 50599-2-Ig         |
| Bcl-2                                           | Proteintech                                                | 1:1000                    | 12789-1-AP         |
| Dystroglycan                                    | R&D Systems                                                | 1:1000                    | AF6868             |
| Laminin                                         | Sigma-Aldrich                                              | 1:1000                    | L9393              |
| LAMP1                                           | Abcam                                                      | 1:1000                    | ab24170            |
| LC3B                                            | Novus Biologicals<br>Cell Signaling Technologies           | 1:1000 (WB)<br>1:250 (IF) | NB100-2220<br>2775 |
| mTOR (7C10)                                     | Cell Signaling Technologies                                | 1:1000                    | 2983               |
| Myosin heavy chain                              | Developmental Studies<br>Hybridoma Bank                    | 1:200 (WB)<br>1:50 (IF)   | MF-20              |
| p44/42 MAPK (Erk1/2)<br>(Thr202/Tyr204)         | Cell Signaling Technologies                                | 1:1000                    | 9102               |
| Phospho-Akt (Ser473) (D9E)                      | Cell Signaling Technologies                                | 1:1000                    | 4060               |
| Phospho-mTOR (Ser2448)<br>(D9C2)                | Cell Signaling Technologies                                | 1:1000                    | 5536               |
| Phospho-p44/42 MAPK<br>(Erk1/2) (Thr202/Tyr204) | Cell Signaling Technologies                                | 1:1000                    | 4370               |
| Phospho-ULK1 (Ser757)                           | Cell Signaling Technologies                                | 1:1000                    | 6888               |
| ULK1 (D8H5)                                     | Cell Signaling Technologies                                | 1:1000                    | 8054               |

## Supplemental references

- Darabi, R., Arpke, R.W., Irion, S., Dimos, J.T., Grskovic, M., Kyba, M., and Perlingeiro, R.C. (2012). Human ES- and iPS-derived myogenic progenitors restore DYSTROPHIN and improve contractility upon transplantation in dystrophic mice. *Cell Stem Cell* 10, 610-619. 10.1016/j.stem.2012.02.015.
- Dhoke, N.R., Kim, H., Selvaraj, S., Azzag, K., Zhou, H., Oliveira, N.A.J., Tungtur, S., Ortiz-Cordero, C., Kiley, J., Lu, Q.L., et al. (2021). A universal gene correction approach for FKRP-associated dystroglycanopathies to enable autologous cell therapy. *Cell Reports* 36. 10.1016/j.celrep.2021.109360.
- Nickolls, A.R., Lee, M.M., Zukosky, K., Mallon, B.S., and Bonnemann, C.G. (2020). Human embryoid bodies as a 3D tissue model of the extracellular matrix and alpha-dystroglycanopathies. *Dis Model Mech*, dmm042986. 10.1242/dmm.042986.
- Ortiz-Cordero, C., Magli, A., Dhoke, N.R., Kuebler, T., Selvaraj, S., Oliveira, N.A., Zhou, H., Sham, Y.Y., Bang, A.G., and Perlingeiro, R.C. (2021). NAD<sup>+</sup> enhances ribitol and ribose rescue of alpha-dystroglycan functional glycosylation in human FKRP-mutant myotubes. *Elife* 10. 10.7554/eLife.65443.
- Selvaraj, S., Mondragon-Gonzalez, R., Xu, B., Magli, A., Kim, H., Laine, J., Kiley, J., McKee, H., Rinaldi, F., Aho, J., et al. (2019). Screening identifies small molecules that enhance the maturation of human pluripotent stem cell-derived myotubes. *Elife* 8. 10.7554/eLife.47970.
